# Supplementary material
Source: publisher site journal article supplement (https://www.dovepress.com/get_supplementary_file.php?f=337072.docx)
Supplement: Supplementary file 1 [file get_supplementary_file.php]

**APPENDIX 1**

**Interview guide.**

**Instructions for investigator**

Patient interviews must be conducted face-to-face. Interviews will be recorded. The recordings will

serve as a support and source file.

Thus, it is the interviewer's responsibility to ensure that his or her recording equipment is functioning

properly before beginning the interview.

The investigator should proceed as follows:

o Briefly introduce the study to the patient

o Reassure the patient that all answers will be kept confidential and anonymous.

o Obtain the patient's agreement to record the interview before starting

o Ask the patient if he/she has any questions

o Let the patient respond spontaneously at first, then use pivot questions.

*PROBING* should be used if the patient has difficulty answering the question or if he/she does not

provide enough information with his/her spontaneous response. Ask the patient to expand on what

he/she said using words such as: "tell me more", "give an example", "explain why"...

o Nodding your head in agreement is a good way to encourage the participant to continue

without interrupting the conversation.

o Have a support to note interesting things: posture, change of position in relation to a

discomfort felt, any non-verbal information or that we will not hear on the recording...

o Note any good ideas you have for improving the interview guide, such as rephrasing a

question, asking a good question or emphasizing a particular concept, or deleting a question.

At the end of each interview, you will make a brief report of the problems you encountered, the

concepts you feel are missing, and the information that was not recorded.

**During the interview, if necessary, do not hesitate to remind the interviewer of its anonymous and confidential nature.**

faf

**Presentation of the study to the patient**

I am an interviewer. As part of a scientific study, our team would like to interview people like you in

the emergency room to find out how you feel about asthma and its management during your visit to

the emergency room. It is your personal perception that interests us.

I would like to make it clear that **participating in this interview has no bearing on the quality of care**

**you will receive**. Also, **this interview will remain strictly anonymous, confidential.** With your

permission, I will record it. This will then be transcribed in writing. Only our research team will be able to read it.

To do this, I would like you to **feel comfortable and speak to me very freely**.

Are you ready to get started?

**Turn on** *the recorder* **and ask the patient:**

1. Do you voluntarily agree to participate in this interview and do you agree to have it recorded?

2. Before we begin, do you have any questions about this interview?

1. Privacy and socio-demographic data

First of all I have some general questions:

· How old are you ?

· (*if in doubt*) your gender ?

· Your country of origin ?

· What is your highest degree ?

· What do you do for a living (as a job) ?

**Pivot question**:

o Are you a student? Looking for a job? *Or other*?

· Do you have a medical insurance ?

· Do you smoke ? Cannabis How long have you been smoking?

· Have you been vaccinated against the flu ?

· Your weight, your height ?

· Do you have rhino-sinusitis ; proven food allergy ; respiratory allergies

**To relax the interviewee, ask him/her how the trip to the emergency room went.**

1. Evaluation of the level of information and perception of the disease

· how long have you had asthma ?

· What do you think asthma is ?

**Pivot question**:

o what does asthma mean to you?

o How do you live it?

· What are the consequences of this disease ?

**Pivot question**:

o Is your asthma severe? Why?

o Are you concerned about your asthma?

· Can you tell me what you know about asthma?

**Pivot question**:

o When do you say someone has asthma?

o What causes this disease?

o How did you get this information? (If the patient is truly aware of their illness)

· How long do you think you will suffer from the disease ?

**Pivot question:**

o Is it a long-term illness for you?

o Is it a lifelong disease?

III- Diagnosis, disease history, recognition and follow-up of asthma.

a) Diagnosis

· In what situation have you been told that you have asthma ?

**Pivot question:** What happened?

· What are the signs that made you think you had asthma ?

· What tests have you done for asthma ?

· Who is the doctor who made the diagnosis ? Pulmonologist? Allergist?

· have you done the EFR (Functional Respiratory Explorations ? or breath measurement

**Pivot question**: Explain the exam (describe it)

· Do you know what PEAKFLOW is ?

o **If so,** do you know your baseline peak expiratory flow volume?

o **if not,** describe the test and ask if he/she has ever done it.

b) History of the disease

· how many times have you been to the emergency room for an asthma attack in the last 12

months?

**Pivot question**: When you have an asthma attack, do you come to the emergency room?

o **If yes:** how many times?

o Why is this?

o If not, why not?

o when was the last time you went to the emergency room for an asthma attack?

· When was the last time you had an asthma attack?

**Pivot question**:

o Do you remember the last time you had an asthma attack?

o What was the date (approximate date if the person has memory lapses)?

· Have you ever been hospitalized in an intensive care unit for an asthma attack ?

· Have you been intubated ? (Remember to define "intubated" for those who may not

understand.

· What treatment are you receiving for the crisis ?

· or How many times a year do you take cortisone (Cortancyl or solupred) for a seizure ?

c) Recognition of asthma attack and disease

1. Perception of symptoms

· What do you think an asthma attack is ?

**Pivot question:**

o what are the symptoms of an asthma attack?

o What are the signs that you are having an asthma attack?

o What is the difference(s) between asthma and an asthma attack?

o Which ones seem to come up in every crisis?

o In your case, what is the first sign that seems to appear?

o Do you know of other possible signs? Have you noticed any other signs?

o For each sign mentioned, could you say which one seems the most important and

why?

o At what point do you feel it is necessary to act?

o What are the signs that you should seek help?

o medical?

o What defines, for you, the moment when the crisis is over?

o What are the possible consequences for you?

o Do you feel concerned by its consequences?

o Do they seem important to you?

o How do you feel about this situation?

2. Perception of control and risk

· In your opinion, is your asthma balanced/controlled (remember to define balanced for those

who don't understand this word)?

o **If so,** why?

o **if not**, why not?

· In what situations do you have asthma attacks ?

o If not exhaustive:

 Do you know of any other situations that put you at risk for an asthma attack ?

 How do you explain the appearance of these symptoms ?

 What cause(s) do you associate your symptoms with ?

 Are these symptoms caused by you or by the outside world ?

· What are some ways you can avoid symptoms ?

**Pivot question**:

o What are the ones you might consider?

o Do you think you can prevent these symptoms from occurring?

o Do you think you can control them?

o Can you think of a time when you were able to control these symptoms (and how)?

o Could you talk about this current crisis situation where you had to go to the

emergency room?

o What do you think you could have done?

o Were you able to do so?

o Specifically, what do you do if the symptoms worsen?

 Number of inhalation

d) Follow-up of the disease

· How is the follow-up going ?

· What's easy about follow-up ?

· What is the problem ?

· what are the things/mechanisms/who could help you ?

· Since the diagnosis of asthma, have you had a consultation specifically for asthma ?

· Which health professional(s) are following you ?

**Pivot question**:

o Who do you see as part of your asthma follow-up?

o Since when?

· How often do you see your referring doctor (the person who follows you) for asthma per year ?

**Pivot question**:

o **If so,** why?

o **if not**, why not?

· Do you have any tips, tricks or "tools" to help you keep track of your disease ?

**Pivot question**:

o if yes: which ones?

o if not, would you like to know about them?

o Do you know of any mobile applications (think about defining it and/or explaining it to some people) to help you manage your disease?

 what do you think about the use of these mobile applications ?

IV- Treatments

· What are your asthma treatments ?

o Relay: What medications are you currently taking for asthma?

o Do you know what they are used for? Do you know how to distinguish between

treatments for the crisis and treatments for everyday life? (background treatment)

· Do you have or know of a background treatment (treatment that you must take every day)?

o **If yes** Do you take it every day?

o **If not:** why?

**Pivot question**:

 Is it an oversight?

 Does it bother you to take it every day?

 When do you think you should take it?

 have you ever received an explanation of the treatment?

 Is it a problem to receive cortisone?

· Do you think you have a good inhalation technique?

o Why? Whatever the answer

o Do you find it complicated?

 explain me (why it's complicated or not)

· Have you ever been shown the inhalation technique?

o Pivot question: Has anyone ever explained to you how inhalation is done?

 If so, do you get a reminder at each visit?

 If not, would you like us to show it to you?

- · Were there any treatment adjustments based on your difficulties?

o Pivot question: was your treatment tailored to you because you had difficulty following it?

· Do you have a written action plan?

Pivot question: Have you been given a handout that explains what to do in case of an asthma attack?

o if so, do you respect it?

o if not, would you like to have some?

· What do you think of the treatments?

**Pivot question**:

o How do you feel about the inhaler?

o Does this bother you? :

 Can you describe this discomfort to me

 Does the look of others bother you

 Do you feel like you are diminishing?

 Disability?

o Do they seem effective to you?

o Do you think there are other solutions?

o Are they possible in your case?

· What can you say about the people around you?

**Pivot question**:

o Do you feel supported?

o Who are the people you can count on?

o What do the people around you think of your illness?

o Can you talk about your illness with those around you?

o What do the people around you think about your treatment?

V- Conclusion

· The interview is almost over.

· If you return to see your doctor tomorrow, which of the topics we discussed during the

interview would you like to review with him/her?

· Is there anything related to asthma that you would like to add?

Thank you for agreeing to participate in this study. Goodbye.

Supplementary Method:

Data saturation definition:

In interviews, when the researcher begins to hear the same comments again and again, data saturation is being reached… It is then time to stop collecting information and to start analysing what has been collected. (Extract from: Grady MP. *Qualitative and Action Research: A Practitioner Handbook.* Bloomington: Phi Delta Kappa Educational Foundation; 1998)

Delphi method:

The Delphi technique is a scientific method to organize and manage structured group communication processes with the aim of generating insights on either current or prospective challenges; especially in situations with limited availability of information (extract from: Beiderbeck D, Frevel N, von der Gracht HA, Schmidt SL, Schweitzer VM. Preparing, conducting, and analyzing Delphi surveys: Cross-disciplinary practices, new directions, and advancements. *MethodsX*. 2021).

Supplementary qualitative study

| **Table S1.** Level of information, knowledge and perception of asthma | | |
| --- | --- | --- |
| Themes | Subthemes | Quotes |
| Information/ knowledge level | Poor knowledge of the disease | P1: “I don't know what asthma is. It's in the lungs but that's it. […]I don't know when it can happen. The peak expiratory flow I don't know what it is, the pneumologist doesn't do it for me, but in the emergency room they did it last week.”  P2: “ it's the bronchial tubes that uhhhh that retract, .... Why, is it due to the weather, is it due to pollution, I don't know. [...] All I know is that it was explained to me when I was a teenager.”  P3: “Well, I don't really know what asthma is […]. It reaches the bronchi, the lungs, I think it's for life, isn't it?”  P4: [...] I don't know what it really is. Honestly I'm being followed Dr M(name of the pneumologist) but they didn't explain it to me like that but deeply. They didn't give me any details about what it can do to lung....  P5:You see, for me I think that asthma was no more serious […]For me there are several kinds of asthma [...] they explained to me that the bronchial tubes are obstructed and don't let air through, for me that's it [...]  P6: Is it uhhhhh it's in the bronchial tubes or in the lungs too. [...] For example during an attack if you are not treated, it can kill the person? [...] I hope that I wiil not suffer all my life through the medical progress. […]it can be cured. [...] I don't know what peak expiratory flow is.  P7: I'm not very well informed about asthma [...] I think that once you have it, you can't treat it, I guess....  P8: Asthma is breathing difficulties. It is a decrease in respiratory capacity and therefore activity. [...] It's when I have attacks that I'm interested, that's for sure. It's my general practitioner and I had several diseases at the same time. We don’t go into detail. [...] I don't have any information voluntarily, I didn't ask questions voluntarily. |
| Perception | Ambiguity about the fear and severity of asthma  Feeling physically and socially handicapped  Isolated or isolating patient  Fate of the situation  Impaired quality of life | P1: Asthma scares me when I can't breathe, when it doesn't go away with the treatment.  P2: Well it's uhhh for me it's a crisis, it's panic, uhhhh, it's hard to breathe so that's, it's vital. When you can't breathe it's serious [...] Well, if it's treated well, if you follow the treatment correctly, it's not serious.  P3: For me right now it's not serious. [...]No, no, it doesn't worry me more than that. [...]Afterwards I think I take things a bit lightly, that's true, I think it could be that I take things lightly and it's really when I go to the emergency room that I realize that yes, it's quite serious.  P4 It worries me and makes me very tired [...]When you have trouble breathing right away you think of death. I'm a bit scared.  P5: You see, for me I didn't think that asthma was more serious than that [...] Asthma when I saw that I was hospitalised I saw that it was serious [...]  P6: Is it dangerous for the person. [...] We say to ourselves "Oh, my heart, it's going to stop". Sometimes I feel like I'm going to die [...] It doesn't worry me very much but an attack does. It's an illness like any other illness. [...]First I thought it was uhhhh it was nothing.  P7: It doesn't disturb me in my daily life, one spray of Ventoline and and it’s back to normal. I know that asthma can kill you. [...] as I don't see it as something dangerous or serious I don't worry about it.  P8: No, it's not serious, it's not cancer. No, it doesn't worry me because there are more serious things [...]I want to ignore it [...]. To consider that it doesn't concern me. You know what I mean. Yes, I make a denial, I try to move forward by avoiding thinking about it ... I consider that it's not that serious.  P1: Asthma is a handicap because it's hard, but I don't feel diminished compared to another person.  P2:(question: Compared to a colleague who is the same age as you and who is not asthmatic, do you feel a little less strong, a little less diminished compared to him?) Yes, in terms of breathing yes, yes of course.  P3: I can see that she is healthy and I am not. She is going to do sport, I can't do sport. I feel weaker, I often get bronchitis, and she is very healthy and I wonder if it is me who is not normal.  P4: I find that disabled because of asthma. For me it's a big handicap because I'm often in the middle of people, [...]. I feel weaker than a friend who is the same age as me [...]. When I go to interviews I don't say I have asthma.  P5: [...] My mother who is 75 years old she breathes very well, I feel weak compared to her. I can't carry shopping bags any more, whereas my mother at 75 she carries it for me.  P6: Things are dragging on, in any case I've often been off work, in fact since November I've taken several weeks off.  P8: At what point can we consider that I am no longer fit to work in a park given the state of my illness. [...] Apart from running I do everything, but it's a lot, for me it's a big limitation. [...] Yes, it is a handicap.  P1: When I phone someone there is no one there, my son is at school so I don't call. Either I come straight to the hospital or I call the fire brigade. Once I can't move and the neighbours took me to the emergency room.  P2: I try to manage on my own.  P3: I don't talk about it much, I'm with me and my illness.  P4: Because as I live alone at times I find it hard to breathe and so I can choke on my own in the house.  P5: And when my children aren't there I don't take the risk of going up the stairs.  P8: We don't talk about it too much, it's not a main subject, it's not a subject anymore in fact because it's already been mentioned, it's not a subject anymore. (to talk about it with the family)  P1: I'm finished, I'm going to the scrapyard. I'm very very tired. It's God who gave me this. [...]  P3: Well, I live it as I can, I make do with it and uh... anyway we don't have much choice, we're obliged to accept what we have, eh?  P4: I get by, if I don't get by I can't be there.  P5: I think I'm going to suffer for the rest of my life. I would like to get better but I don't know if it can be cured... I'm embarrassed but I don't have a choice because it's my illness. I don't do it on purpose[...].  P6: Despite the fact that I have asthma with my treatment, I accepted it slowly and gently and it helped me to recover.  P8: It's an obligation; I have no choice. [...] so I am now classified as asthmatic [...].  P1: When I move a little or when I laugh with my son I cough a lot. It's complicated at home. I cough a lot, I can't breathe, afterwards I'm very tired, I have a headache, I can't move [...] I go out less, I do fewer things, it's my son who does the shopping.  P2: Especially when I run, when I go to the gym […]. I would have liked to run for an hour but I can’t.  P3: I can't do sport, on long distances I'm out of breath..., when I go up stairs I need my Ventoline. [...] Well, shopping, walking, I used to do it a lot, now I don't do it anymore.  P4: I don't do physical work anymore […]. I catch the bus when I run but if I run I get on the bus there (she shows me her ventolin). I avoid going to the gardens because of the flowers and pollen and I don't like animals either, cats or dogs [...].  P5: I can't walk much. [...] I don't park one or two kilometres away to walk and get tired. These last four years I'm not living very well because I can't do anything. When we go to Disneyland with my children I'm unable to play games with them. [ ...] I can't stay in the shopping centre for long. And then I avoid the world because with the world I have, I'm stressed. [...] It's better not to spend energy and not to do it. [...]it's often at night I don't sleep because I'm afraid. During the day it's still fine in the evening, I find it difficult to manage the crisis, but during the day it's fine [...] I like to dance but I can't, it's a physical effort, it's my passion to listen to music, dance and sing, even singing I can't do it anymore because I have more voice. |

| **Table S2.** Procedures for diagnosing the disease, recognising a crisis, conduct during a crisis | | |
| --- | --- | --- |
| Themes | Subthemes | Quotes |
| Disease  Action during a crisis | Recognition by patient  Diagnosis  Not really sure  Triggering factors unknown  No asthma action plan, therapeutic management | P1: I can't breathe, cough, I'm tired, I have a headache. I don't sleep well at night or during the day. [...]  P2: [...] I take 2 puffs of Ventoline and that's it. And when I take too much, more than 2 a day, it's because I'm not well.  P3: [...] I have difficulty breathing, my lips turn purple, my head starts to turn and then I feel sick. I also cough the most at night.  P5: It's because you have trouble breathing that you're out of breath because you get tired quickly, you can't do any activity. [...] It was whistling, I was coughing, and I have trouble for breathing.  P6: Asthma is, how should I put it, you can't breathe. A person is asthmatic when he has a wheezing breathe, he is weak, he feels dizzy, he can't, he is blocked, he can't do anything anymore.[...] It mostly whistles, it itches and I cough mostly at night, I spit. Usually I don't cough or spit, it's only when I'm ill. The first and most important sign that tells me I am having an asthma attack is the wheezing.  P7: I’m wheezing, I'm out of breath [...] the cough, I had trouble breathing [...]  P8: Because I had difficulty breathing, I woke up at night. I coughed a lot, wheezed a lot, but I didn't feel any discomfort, almost dizzy. When I woke up, I tried to get some air but I couldn't.  P1: Yes, it was a lung specialist who makes the diagnosis after respiratory functional explorations  P2: Yes, I've already done respiratory functional explorations because I've heard that word before.  P3: I haven't done any other tests for asthma. It was the general practitioner who made the clinical diagnosis without doing any other exams [...]  P6: I went to a pneumologist, and he tested me. I don't know how it's called, I know it's to see the capacity yes, that's when I knew I was asthmatic [...]  P7: I saw a pneumologist 25 years after first symptoms. He made a test in a cabin with air, without air or I don't know what there. You blow into a thing with a curve, it was the first time.  P8: I've done respiratory functional explorations before, that's how the diagnosis was made  P1: maybe pollen, when I go to the gardens, in the cold aisles in the shops, scented candles...  P2: as I am a little stressed at the moment, we often tell me it's also due to stress. Why, is it due to the weather, is it due to pollution, I don't know.  P3: no, frankly I don't know, maybe stress, anxiety and panic [...] pollution, and pollen and flowers.  P4: Every month when I'm stressed, I have crises. [...] the house where I live is damp, there is a lot of humidity. [...] We thought it might be the pollen [...] It's mostly winter, with the cold [...] Often when I get bad news, [...]  P5: I'm claustrophobic, I can't use the small lift. I'm always afraid of being stuck during a crisis [...]. For example, when the pollen season doesn't allow me to go out, weather changes, the heat, the humidity, the cold. In Paris I can’t go out, it's really polluted.  P6: But honestly, my illness is triggered by nerves, yeah, it's stress. It was damp in 2003, I was in Algeria, I came to France [...] I couldn't breathe. [...] I have asthma attacks when there is pollen, when I breathe in household cleaning products, stress and also I have noticed dog hair.  P7: big allergies to all that is pollen and grasses it was in spring [...] when I drank alcohol I was much more out of breath.  P8: [...] It's obvious to me that it's all related to stress [...] Yes, it is the outside elements that trigger asthma attacks, pollen, anxiety, pollution.  P1: I didn't take more medicine at home I don't know what to do. But I think if I knew what to do I would do it. I just took the 2 puffs in the morning before going to the emergency room.  P2: Yes that's because I don't know. I stay a few hours in my corner panicking. I take the Ventoline a little more. Then I see that it doesn't work, I panic again, I take up the Ventoline again and then as soon as I reach the end I go to the emergency room.  P3: I manage it when it's really very small attacks, but when it's really big I don't manage it at all [...]2 puffs, as the doctor prescribed, he simply told me 2 puffs, if it really doesn't go well with 2 I take 2 more.  P4: As soon as I get up I take 2 puffs, and at bedtime as well and when things go wrong I take 2 more during the day. I do 4 what a day 2 mornings 2 evenings all the time with the symbicort. I don't do more in case of crisis.  P5: It's the first time I've been to the emergency room, because I don't want to go there. [...] I take 2 puffs directly I don't wait and then I take the corticoids and then I wait half an hour for the Ventoline and after an hour it takes effect. And when I see that I'm very tired, well, I'll take it again, not 2 puffs but only one and it didn't go away and I took corticoids and inhaled corticosteroid again. And then I waited every hour to repeat the Ventoline. I only repeated the Ventoline every hour [...] I don't have an action plan.  P6: I don't have a written action plan  P7: For the moment I've always been able to manage things. When I have a crisis I just do a bit of Ventoline, not rest. I just take two puffs and it goes away. No, my doctor hasn't given me an action plan.  P8: Last time he gave me corticoids for a week with classic Ventoline [...] I can't anticipate it's not normal that I have a crisis like this that happens that I can't anticipate so I can't control it. [...] For the moment I don't have a plan. [...] I just took a Ventoline, I didn't do anything else. |

| **Table S3.** Knowledge and perception of treatments, therapeutic care, therapeutic education, and monitoring the disease. | | |
| --- | --- | --- |
| Themes | Subthemes | Quotes |
| Treatments | Poor knowledge of treatments  Poor compliance  Feeling that you are taking too many medicines or inappropriate treatments  Side effects of treatments/ corticosteroids  Sometimes embarrassed to take medication in front of people  Low level of involvement of asthma practitioners  Quality of follow-up/ therapeutic education | P1: I don't know the difference between long and short term treatment, but I know that you have to take it every day.  P3: the treatment melts I think there is the singular and the ventolin.  P5: The secret is to prevent a crisis, i.e. if I take it I won't have a crisis for me in my head I think like that.  P6: I don't know the difference between my basic treatment and a crisis.  P8: For the moment I don't know the difference between the different treatments I will see when I see the pneumologist.  P1: Sometimes I forget to take it when I'm well but [....]  P2: As soon as I saw that it was going well, I didn't follow my treatment. Flixotide/Seretide they told me to take it 2 mornings and 2 evenings, I wasn't taking it.  P4: sometimes I take well, sometimes I don't take well. [...] When I get up coughing I take it but at times when I'm fine I don't even cough. [...] I don't mind, but I often forget it because I am old, I often forget.  P6: I take my Symbicort every day. Sometimes I forget it when I'm well. I think I don't use my treatments well.  P1: I'm fed up with medicines, I take them every day. All the time I take it for asthma or my back pain, for my knees well I'm fed up.  P2: try not to take too much. I just didn't know how dangerous it was to take too much. So I already had four, not four in a row, we go 4-5 during the day, so in my head I said to myself, is it dangerous to take too much or not?  P3: Yes, it's true that I sometimes have exceed the prescribed doses [...]. But my problem is that I avoid taking it because I know it's not good for my health […]. But generally I don't exceed the doses, I avoid them. And I have taken the symbicort 400 in fact normally, I take the 200 in the morning and 400 in the evening so I sometimes take the symbicort 400 during the day but after that it won't kill me ...  P6: Sometimes I think that the treatments are not working well.  P8: I think that the daily treatment can make it permanent for the rest of my life. [...] afterwards it becomes a habit and you become addicted to the medication. [...]  P3: But what bothers me is that inside there are corticoids, it seems to me, no? [...] Yes, it makes the corticoids swell [...] Well, the fact that I gain weight [...] But it's mainly the weight gain that I can't do sport if I put on weight.  P5: after I had mouth ulcers everywhere, she changed so many treatments that I couldn't. [...] It worries me because my heart was beating too fast. I have pain in my chest because of the medication, I have palpitations, [...] I have aches and pains in my chest. [...] I feel swollen and bloated...  P8: I don't mind taking corticoids, on the contrary.  P3: It bothers me when people look at me, the problem is that people are too curious and that bothers me. I feel bad, I feel embarrassed. I feel judge because I show them that I'm sick  P4: And then when there's the world I don't like to take too much, when I take it I'm told at your age you have asthma, my friends say my friends say that. They often make fun of me. You shouldn't show the disease too much  P7: When I use it I put myself in a little corner, I don't make a special show of myself, but I put myself in a little corner and turn my back on people and I do it.  P8: No, but even so, I didn't take it in public at first but I have some pride because I too can be sick. In my professional environment I also say I too can be ill.  P3: By the general practitioner, it was really vague what we didn't really get into.  P4: It has been a moment that I haven't seen a doctor (pneumologist) because it's always the same thing in fact. Because I come, I blow afterwards, that's as far as it goes. Since 2004 I see the specialist at least once a year. We don't talk about it at all with the attending doctor, it's only the last time [...] but then what is asthma?  I ask but I don't have a good answer.  P6: No never, I have never been told what asthma is [...] I don't know how to avoid attacks. Maybe give education to the person like diabetic people. I often go to the emergency room very badly and then I go home but I am always suffering. I would like to have a card to know what to do. I have a friend who is under the care of a respirologist and she has the same treatment.  P7: No, he didn't explain more than that, he looked at the X-rays we take at the hospital and he told me I had an infection, he told me I was going to get a little pneumonia, he put me in a cabin blowing into something and then he told me I had to be under treatment for 3 months.  P8: That is to say that the doctor, instead of telling me to take the ventolin when things aren't going well even at the beginning, as I had more, you come back to see me [...] but he didn't even tell me with a letter to go and see the respirologist so that everything would be under control more quickly. [...].  Yes, but it's not my role, it's not my role to treat.  P1: I see the pneumologist every 6 months. But once it had been 10 months and he asked me how badly I was breathing why I hadn't come sooner. He asked me several times why I didn't come. He scolded me a bit [...] My pneumologist doesn't regularly show me the inhalation technique. I don't dare to ask them to explain more.    P2: I'm not monitored and my doctor is not a pneumologist. So I'm going to tell him that I'm not well, he's going to renew my prescription and that's all there is to it. ...] I'd like to be monitored because really is what I'm always asthmatic, is what it is in my head, is what it is ...] I haven't seen a respirologist since I was a teenager. ...] I've been told not to run when there's pollution for example, not to make any physical effort. And to tell the truth, I'm not like that, I'm not what I am, I'm not what he says on a Sunday, he says not to run and then that I have to go to the football, so I go anyway. I'm going to do my normal sport and there's nothing to worry about.  P3: The doctor who treated me told me that we didn't really get into the subject [...] In fact, he let me loose with the treatments [...] I didn't have a protocol, the last time I saw him he told me it was a crisis, that he was going to the emergency room. I think he is letting go of my situation a little bit [...] no I didn't get anything, they didn't explain anything to me (talking about the technique for inhalations)  P4: It's been a year since I've seen the pneumologist... The doctor has already shown me the technique, but not every time, at the beginning the first time I came across it.  P5: The pneumologist is much later. My general practitioner, I have always been followed with him and he advised me to do an EFR [...] I was followed in 2003 by the doctor there and after I stopped [...]I've been under the care of doctor A (pneumologist) since 2011 or 2012. [...] I'm currently seeing my pneumologist twice a year.  P5: The pneumologist is much later. My general practitioner, I have always been followed with him and he advised me to do an EFR [...] I was followed in 2003 by the doctor there and after I stopped [...] there he told me no you really have to be followed regularly with a pneumologist. ...] I've been under the care of doctor A (pneumologist) since 2011 or 2012. [...] At the moment I see my pneumologist twice a month on a regular basis since January and February my GP is just every 3 months.  P6:I don't have any problems when I don't feel well I go to see my doctor. I don't go to see him when I feel well. I've never had an asthma consultation; I've never had an asthma doctor.  P7: [...] I saw a pneumologist 25 years later [...] I never even consulted my GP, even for an asthma attack, just for the renewal of medication  P8: It wasn't the doctor who showed me it was a colleague because he hadn't shown me that I had to empty myself and breathe in a little before sending the puff. |

APPENDIX 2- AERO Study Questionnaire
